# Supplementary material for: Maternal Immunoreactivity to Herpes Simplex Virus 2 and Risk of Autism Spectrum Disorder in Male Offspring
Source: PubMed Central journal article supplement (PMC5322345; doi:10.1128/msphere.00016-17), 2017-02-22

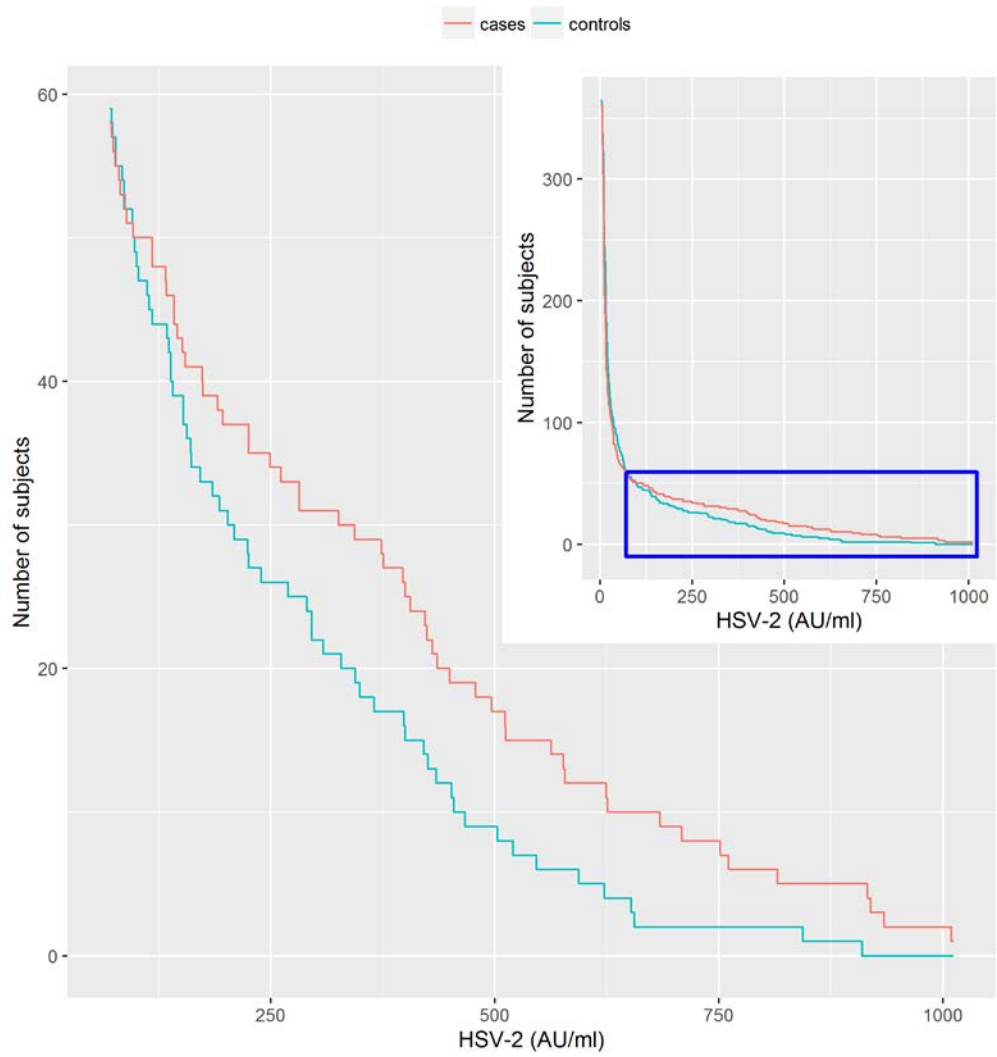

Supplement: sph001172238sf2.pdf [file sph001172238sf2.pdf]
